1 Neighbor QTL: an interval mapping method for  
2 quantitative trait loci underlying plant  
3 neighborhood effects

4 Yasuhiro Sato\*<sup>1</sup>, Kazuya Takeda<sup>†2</sup>, and Atsushi J. Nagano<sup>‡3</sup>

5 <sup>1</sup>PRESTO, Japan Science and Technology Agency, Kawaguchi, Saitama  
6 332-0012, Japan; Research Institute for Food and Agriculture, Ryukoku  
7 University, Yokotani 1-5, Seta Oe-cho, Otsu, Shiga 520-2194, Japan

8 <sup>2</sup>Center for Ecological Research, Kyoto University, Hirano 2-509-3, Otsu,  
9 Shiga 520-2113, Japan

10 <sup>3</sup>Faculty of Agriculture, Ryukoku University, Yokotani 1-5, Seta Oe-cho, Otsu,  
11 Shiga 520-2194, Japan

12 September 19, 2020

---

\*Co-correspondence: [sato.yasuhiro.36c@kyoto-u.jp](mailto:sato.yasuhiro.36c@kyoto-u.jp)

<sup>†</sup>Y. Sato and K. Takeda equally contributed to the study.

<sup>‡</sup>Co-correspondence: [anagano@agr.ryukoku.ac.jp](mailto:anagano@agr.ryukoku.ac.jp)

## 13 Abstract

14 Phenotypes of sessile organisms, such as plants, rely not only on their own genotype but  
15 also on the genotypes of neighboring individuals. Previously, we incorporated such neighbor  
16 effects into a single-marker regression using the Ising model of ferromagnetism. However,  
17 little is known about how to incorporate neighbor effects in quantitative trait locus (QTL)  
18 mapping. In this study, we propose a new method for interval QTL mapping of neighbor  
19 effects, named "Neighbor QTL". The algorithm of neighbor QTL involves the following:  
20 (i) obtaining conditional self-genotype probabilities with recombination fraction between  
21 flanking markers, (ii) calculating neighbor genotypic identity using the self-genotype prob-  
22 abilities, and (iii) estimating additive and dominance deviation for neighbor effects. Our  
23 simulation using F2 and backcross lines showed that the power to detect neighbor effects  
24 increased as the effective range became smaller. The neighbor QTL was applied to in-  
25 sect herbivory on Col  $\times$  Kas recombinant inbred lines of *Arabidopsis thaliana*. Consistent  
26 with previous evidence, the pilot experiment detected a self QTL effect on the herbivory  
27 at *GLABRA1* locus. We also observed a weak QTL on chromosome 4 regarding neigh-  
28 bor effects on the herbivory. The neighbor QTL method is available as an R package  
29 (<https://cran.r-project.org/package=rNeighborQTL>), providing a novel tool to investigate  
30 neighbor effects in QTL studies.

## 31 1 Introduction

32 Sessile organisms, such as land plants, have no active mobility to escape neighboring individ-  
33 uals. Field studies have shown that the phenotypes of an individual plant depend not only  
34 on their own genotype but also on those of neighboring plants (Barbosa et al., 2009). Such  
35 neighbor effects are mediated by direct interactions (e.g., competition and volatile com-  
36 munication) or indirect interactions (e.g., herbivore and pollinator movements), and thus  
37 modulate complex traits throughout a plant life cycle, including growth (Subrahmaniam  
38 et al., 2018), defense (Schuman et al., 2015; Sato, 2018; Tamura et al., 2020), and reproduc-  
39 tion (Underwood et al., 2020). There is increasing appreciation that plant-plant interactions  
40 within a species may result in increased yield and population-wide pest resistance (Zeller  
41 et al., 2012; Wuest and Niklaus, 2018; Yang et al., 2019). However, knowledge remains lim-  
42 ited about how to analyze the quantitative trait locus (QTL) underlying plant neighborhood  
43 effects.

44 QTL mapping is a well-established approach to analyze the loci responsible for complex  
45 traits (Broman et al., 2003; Broman and Sen, 2009; Broman et al., 2019). Although genome-  
46 wide association studies (GWAS) have now been developed, there are several limitations of  
47 this approach such as false positive signals due to the population structure (Hayes, 2013) and  
48 small-effect variants being overlooked if they are rare in the sample population (Korte and  
49 Farlow, 2013). While recombination events are limited in experimental crosses, the experi-  
50 mental approaches would overcome the problem of population structure and rare variants.  
51 In plant genetics, once GWAS leads us to find a pair of target accessions, its biparental  
52 population is then subject to QTL mapping (Sonah et al., 2015; Han et al., 2018). There-  
53 fore, QTL mapping provides a complementary analysis for GWAS to further dissect complex  
54 traits in plant genetics and breeding (Sonah et al., 2015; Rishmawi et al., 2017; Han et al.,  
55 2018; Marchadier et al., 2019).

56 Using the Ising model of statistical physics, our previous study proposed "Neighbor  
57 GWAS" that combined neighbor effects and a linear mixed model (Sato et al., 2019b). The  
58 core idea of neighbor GWAS was to consider the Ising model as an inverse problem of single-  
59 marker regression and, thereby, estimate the effects of neighbor genotypic identity on a trait.  
60 However, QTL mapping of neighbor effects is more complicated than single-marker analysis  
61 because QTL studies employ the maximum likelihood method for interval mapping between  
62 flanking markers (Haley and Knott, 1992; Jansen, 1993; Broman and Sen, 2009). Such an  
63 interval mapping requires a stepwise inference from genotype imputation to phenotype pre-  
64 diction. First, conditional genotype probabilities are obtained from the observed marker  
65 genotypes and recombination fractions between flanking markers. Then, phenotypes are  
66 inferred using the conditional genotype probabilities and marker effects (Haley and Knott,  
67 1992). To adopt interval mapping for neighbor effects, it is necessary to define the effects of  
68 neighbor genotypic identity on a quantitative trait.

69 In this study, we developed an interval mapping method for testing neighbor effects in  
70 QTL studies. The proposed method, "Neighbor QTL", was applied to simulated data and  
71 recombinant inbred lines (RILs) of *Arabidopsis thaliana*. Furthermore, the new QTL method  
72 was built into an R package.

## 73 2 Materials and Methods

### 74 2.1 Model

75 We first developed a basic regression model and then defined QTL effects for interval map-  
76 ping. To combine neighbor effects and a linear model, we focused on the well-known model  
77 of statistical physics, Ising model (McCoy and Maillard, 2012). The Ising model defines  
78 magnetic energy arising from physical interactions among neighboring magnets. By analogy,  
79 we regarded an individual as a magnet, genotypes as dipoles, and a trait as energy. Given

80 the observed traits (or energy), we estimated interaction coefficients of the Ising model to  
81 infer neighbor effects.

### 82 **2.1.1 Joint regression for self and neighbor effects**

83 To incorporate neighbor effects into a linear regression, we developed a joint model follow-  
84 ing the single-marker regression of neighbor GWAS (Sato et al., 2019b). We considered a  
85 situation where a number of inbred lines occupied finite sites in a two-dimensional space  
86 and assumed that an individual is represented by a magnet, whereby two homozygotes at  
87 each marker, AA or BB, correspond to north or south dipole (Fig. 1). We defined  $x_i$  or  
88  $x_j$  as the genotype at a focal marker respectively for  $i$ -th focal individual or  $j$ -th neighbor,  
89 where  $x_{i(j)} \in \{\text{AA}, \text{BB}\} = \{1, -1\}$ . We then used multiple regression to model the effects of  
90 self-genotype and neighbor genotypic identity on a trait of  $i$ -th individual  $y_i$  as

$$y_i = \beta_0 + \beta_1 x_i + \frac{\beta_2}{L} \sum_{\langle i,j \rangle}^L x_i x_j^{(s)} + e_i \quad (1),$$

91 where  $\beta_0$ ,  $\beta_1$ , and  $\beta_2$  indicated intercept, self-genotype, and neighbor effects, respectively.  
92 The residual for a trait value of the focal individual  $i$  was denoted as  $e_i$ . The neighbor  
93 covariate  $\sum_{\langle i,j \rangle}^L x_i x_j^{(s)}$  was the sum of products for all combinations between the  $i$ -th focal  
94 individual and the  $j$ -th neighbor at the  $s$ -th scale of spatial distance from the focal individual  
95  $i$  (Fig. 1). The total number of neighbors  $L$  varied in response to the spatial scale  $s$  to be  
96 referred. The coefficient of neighbor effects  $\beta_2$  was scaled by  $L$ . If two individuals shared the  
97 same genotype at a given locus, the product  $x_i x_j$  became positive; the product  $x_i x_j$  became  
98 negative if two individuals had different genotypes. Thus, the effects of neighbor genotypic  
99 identity on a trait  $y_i$  was dependent on the coefficient  $\beta_2$  and the number of two genotypes  
100 in a neighborhood.

101 Notably, the multiple regression model eq. 1 was posed as an inverse problem of the Ising

102 model. When summing up  $y_i$  for all individuals and substituting coefficients as  $E = -\beta_2/L$ ,  
103  $H = -\beta_1$  and  $\epsilon_I = \sum (y_i - \beta_0)$ , eq. 1 could be transformed into the total magnetic energy  
104 of a two-dimensional Ising model as  $\epsilon_I = -E \sum_{\langle i,j \rangle}^L x_i x_j^{(s)} - H \sum x_i$  (McCoy and Maillard,  
105 2012). In such a case, the neighbor effect  $\beta_2$  and self-genotype effect  $\beta_1$  could be interpreted  
106 as the interaction coefficient  $E$  and external magnetic force  $H$ , respectively.

### 107 2.1.2 QTL effects of neighbor genotypic identity

108 To exchange a linear regression into a QTL model, we defined QTL effects for self and  
109 neighbor effects. With heterozygosity incorporated, we redefined  $x_i$  and  $x_j$  by a marker  
110 genotype for an  $i$ -th focal individual and  $j$ -th neighbor as  $g_i$  and  $g_j$ , respectively. Self QTL  
111 effects expected from those genotypes were denoted as  $g_{i(j)} \in \{AA, AB, BB\} = \{a, d, -a\}$ ,  
112 where  $a$  and  $d$  indicated additive and dominance deviation, respectively. Assuming two  
113 possible directions, we then defined QTL effects by neighbor genotypic identity between  
114 the individual  $i$  and  $j$  (Table 1). Given the QTL effects of self and neighbor effects, we  
115 decomposed a trait of  $i$ -th individual  $y_i$  as

$$y_i = \bar{y} + g_i + \frac{\sum_{\langle i,j \rangle}^L g_i g_j^{(s)}}{L} + e_i \quad (2),$$

116 where  $\bar{y}$  and  $e_i$  indicated a population mean of traits and a residual for the focal individual  
117  $i$ , respectively. Assuming that two marker effects  $a$  and  $d$  were unlikely to be equivalent  
118 between self and neighbor effects, we introduced  $a_1$  and  $d_1$  to the self QTL effects; and  $a_2$   
119 and  $d_2$  to the neighbor QTL effects. If QTL effects were completely additive (i.e.,  $a_1 = a_2 = 1$   
120 and  $d_1 = d_2 = 0$ ), the QTL model eq. 2 had the same structure as the linear regression eq.  
121 1. In such an additive model, the coefficients  $\beta_1$  and  $\pm\sqrt{\beta_2}$  represented additive QTL effects.  
122 It was also worth noting that the sign of  $\pm\sqrt{\beta_2}$  determined the direction of the effects of  
123 genotypic identity on a trait (Table 1).

### 124 2.1.3 Interval mapping for neighbor genotypic identity

125 To enable interval mapping, we extended the single-marker QTL model eq. 2 to multiple  
126 pseudo-markers. In particular, we modified Haley-Knott regression that approximated the  
127 maximum likelihood method by a simple regression (Haley and Knott, 1992; Broman and  
128 Sen, 2009). The proposed algorithm consisted of three steps: (i) obtaining conditional  
129 self-genotype probabilities, (ii) calculating neighbor genotypic identity from the conditional  
130 self-genotype probabilities, and (iii) regressing trait values on the conditional self-genotype  
131 probabilities and neighbor genotypic identity.

132 The first step to obtain conditional self-genotype probabilities was the same as that of  
133 standard QTL mapping. Let  $p_{i(j)}$  be the probability for the focal individual  $i$  or neighbor  
134  $j$  to have a certain genotype at an interval pseudo-marker. We defined the conditional self-  
135 genotype probability for the individual  $i$  as  $p_i = \Pr(g_i = \{AA, AB, BB\} | \mathbf{M})$ , and obtained  $p_i$   
136 from the number of observed markers  $\times n$  individuals matrix  $\mathbf{M}$  and its recombination frac-  
137 tion following hidden Markov models (Lander and Green, 1987; Broman et al., 2003). Based  
138 on the products of the conditional self-genotype probabilities, we further calculated the con-  
139 ditional probabilities for neighbor genotypic identity  $p_i p_j$ . We then defined  $g_i g_j$  as the QTL  
140 effects by neighbor genotypic identity; and  $p_i p_j$  as the expected probability for two genotypes  
141 to interact, whereby the expected neighbor QTL effects was  $p_i p_j g_i g_j$ . These probabilities were  
142 summed up for all possible combinations of the genotypes as  $\sum_v^3 \sum_w^3 [(p_{i,v} p_{j,w}) \otimes (g_{i,v} g_{j,w})]$ ,  
143 where the subscript  $v$  and  $w$  indicated the three genotype states AA, AB, and BB.

144 Similar to Haley-Knott regression, we finally estimated the QTL effects  $g_i$  and  $g_i g_j$  by  
145 regressing the trait values  $y_i$  on  $p_i$  and  $\sum_{<i,j>}^L p_i p_j^{(s)} / L$ , respectively. The additive and  
146 dominance deviation for the self QTL effects  $a_1$  and  $d_1$  were considered as average differences  
147 in trait values among AA, AB, or BB genotypes, such that  $a_1 = (\bar{y}_{AA} - \bar{y}_{BB})/2$  and  $d_1 =$   
148  $\bar{y}_{AB} - (\bar{y}_{AA} + \bar{y}_{BB})/2$  (Broman and Sen, 2009). In such a case, the regression coefficient  $\beta_1$   
149 gave  $2\hat{a}_1$  when -1, 0, and 1 dummy groups were assigned for the AA, AB, and BB genotypes,

150 respectively, or gave  $\hat{d}_1$  when 0, 1, and 0 were assigned for the AA, AB, and BB genotypes,  
151 respectively (Broman et al., 2003).

152 For neighbor QTL effects, the additive and dominance deviation  $a_2$  and  $d_2$  were also  
153 considered as the average differences in trait values among the nine possible combinations  
154 (Table 1) as  $a_2 = [(\bar{y}_{AA/AA} + \bar{y}_{BB/BB}) - (\bar{y}_{AA/BB} + \bar{y}_{BB/AA})]/4$  and  $d_2 = \bar{y}_{AB/AB} - (\bar{y}_{AB/AA} +$   
155  $\bar{y}_{AB/BB} + \bar{y}_{AA/AB} + \bar{y}_{BB/AB})/4 - (\bar{y}_{AA/AA} + \bar{y}_{BB/BB} + \bar{y}_{AA/BB} + \bar{y}_{BB/AA})/4$ . In this case, trait values  
156  $y_i$  could be fitted by a quadratic regression on the group of nine genotype combinations (Fig.  
157 2). Suppose that  $y_i = \beta_0 + \beta_1 p_i + \beta_2 (\sum_{<i,j>}^L p_i p_j^{(s)} / L) + \beta_3 (\sum_{<i,j>}^L p_i p_j^{(s)} / L)^2$  represents such a  
158 quadratic regression, where the linear or quadratic coefficient  $\beta_2$  or  $\beta_3$  provides estimates for  
159 the additive or dominance deviation  $\pm 2\hat{a}_2^2$  or  $\hat{d}_2^2$ , respectively. Practically, we could estimate  
160  $a_2$  and  $d_2$  by the quadratic regression of the trait values  $y_i$  on the neighbor genotypic identity  
161  $\sum_{<i,j>}^L p_i p_j^{(s)} / L$ , with nine genotype combinations encoded as AA/AA, BB/BB, AA/AB,  
162 AB/AA, AB/AB, AB/BB, BB/AB, AA/BB, BB/AA = {1, 1, 0.25, 0.25, 0.0, -0.25, -0.25,  
163 -1, -1}.

164 Based on the linear and quadratic regression, we decomposed a trait  $y_i$  into self and  
165 neighbor QTL effects. To distinguish the two effects, we estimated  $a_1$ ,  $d_1$ ,  $a_2$ , and  $d_2$  by  
166 following the six-step iterations.

- 167 1. Estimate  $a_1$  by a linear regression on self-genotype probabilities, with -1, 0, and 1  
168 encoded for the AA, AB and BB genotypes, respectively.
- 169 2. Estimate  $d_1$  by a linear on self-genotype probabilities regression, with 0, 1, and 0  
170 encoded for the AA, AB and BB genotypes, respectively.
- 171 3. Calculate self QTL effects with  $\hat{a}_1$  and  $\hat{d}_1$ .
- 172 4. Include the self QTL effect as a covariate at a focal marker.
- 173 5. Estimate  $\pm a_2$  and  $d_2$  by a quadratic regression on neighbor genotypic identity, with



174 [-1, 1] dummy groups assigned for nine genotype combinations.

175 6. Calculate joint QTL effects with  $\hat{a}_1$ ,  $\hat{d}_1$ ,  $\hat{a}_2$  and  $\hat{d}_2$ .

176 Based on  $\hat{a}_1$ ,  $\hat{a}_2$ ,  $\hat{d}_1$  and  $\hat{d}_2$ , we inferred  $\hat{y}_i$  and derived log<sub>e</sub>-likelihood (LL) from model de-  
177 viance. LOD score for the self or neighbor effects were designated as  $\text{LOD}_{\text{self}} = \log_{10}[\exp(\text{LL}_{\text{self}}$   
178  $- \text{LL}_{\text{null}})]$  or  $\text{LOD}_{\text{nei}} = \log_{10}[\exp(\text{LL}_{\text{nei}} - \text{LL}_{\text{self}})]$ , which could be obtained in steps 3 and 6,  
179 respectively.

180 When there were only two genotypes, the quadratic regression was replaced by a linear  
181 regression to estimate the additive neighbor effects. For the case of inbred lines lacking  
182 AB heterozygotes, we estimated the additive deviation  $a_2$  by a linear regression of trait  
183 values  $y_i$  on the neighbor genotypic identity  $\sum_{\langle i,j \rangle}^L p_i p_j^{(s)} / L$ , with 1 and -1 dummy groups  
184 assigned for the AA and BB genotypes, respectively. In case of backcross lines lacking  
185 BB homozygotes, the additive deviation corresponded to the dominance deviation so that  
186  $d_2 = -a_2$ . The additive deviation  $a_2$  could be estimated by a linear regression with the  
187 AA and AB genotypes encoded into -1 and 0, respectively. These two linear models were  
188 equivalent in the sense that both inbred and backcross lines had two genotypes with additive  
189 effects.

#### 190 2.1.4 Variation partitioning with the QTL model

191 Prior to the genome scan, we estimated the effective spatial scale  $s$  by calculating the propor-  
192 tion of phenotypic variation explained (PVE) by neighbor effects. Incorporating two random  
193 effects into a linear mixed model, we were able to partition phenotypic variation into PVE  
194 by self effects, neighbor effects, and residuals (Sato et al., 2019b). According to previous  
195 studies (Henderson et al., 1959; Kang et al., 2008), the linear mixed model was expressed as

$$\mathbf{y} = \mathbf{X}\boldsymbol{\beta} + \mathbf{Z}\mathbf{u} + \mathbf{e} \quad (3),$$

196 where  $\mathbf{y}$  indicated a phenotype vector as  $y_i \in \mathbf{y}$ ;  $\mathbf{X}\boldsymbol{\beta}$  indicated fixed effects with a matrix  
197 including a unit vector and all covariates  $\mathbf{X}$  and a coefficient vector  $\boldsymbol{\beta}$ ;  $\mathbf{Z}\mathbf{u}$  indicated random  
198 effects with  $u_i \in \mathbf{u}$  and a design matrix  $\mathbf{Z}$ ; and  $\mathbf{e}$  indicates residuals where  $e_i \in \mathbf{e}$ . The  
199 random effects and residuals were further decomposed as  $\text{Var}(\mathbf{u}) = \sigma_1^2\mathbf{K}_1 + \sigma_2^2\mathbf{K}_2$  and  $\text{Var}(\mathbf{e})$   
200  $= \sigma_e^2\mathbf{I}$ , where the  $n \times n$  individuals similarity matrix for self-genotype or neighbor identity  
201 was scaled by the number of markers  $q$  as  $\mathbf{K}_1 = \mathbf{P}_1^T\mathbf{P}_1/(q-1)$  or  $\mathbf{K}_2 = \mathbf{P}_2^T\mathbf{P}_2/(q-1)$ ,  
202 respectively. Given that one of two alleles is similar between heterozygotes and homozygotes,  
203 here we defined additive polygenic effects for self QTLs as  $g_i \in \{\text{AA}, \text{AB}, \text{BB}\} = \{-1, 0, 1\}$ ;  
204 and for neighbor QTLs as  $g_i g_j \in \{\text{AA}/\text{AA}, \text{BB}/\text{BB}, \text{AA}/\text{AB}, \text{AB}/\text{AA}, \text{AB}/\text{AB}, \text{AB}/\text{BB},$   
205  $\text{BB}/\text{AB}, \text{AA}/\text{BB}, \text{BB}/\text{AA}\} = \{1, 1, 0.5, 0.5, 0.0, -0.5, -0.5, -1, -1\}$ . In these cases, the  
206  $q \times n$  matrix  $\mathbf{P}_1$  included expected self-genotype values as elements  $\mathbf{P}_1 = (\sum_v^3 p_i g_i)$  and  
207  $\mathbf{K}_1$  represented a kinship matrix that was calculated from all the pseudo-markers (Broman  
208 et al., 2019). Similarly, the  $q \times n$  matrix  $\mathbf{P}_2$  included the neighbor genotypic identities  
209 as elements  $\mathbf{P}_2 = (\sum_{\langle i,j \rangle}^L \sum_v^3 \sum_w^3 [(p_{i,v} p_{j,w}^{(s)}) \otimes (g_i g_j^{(s)})])$  and  $\mathbf{K}_2$  represented a genome-wide  
210 structure of neighbor genotypic identity. Based on the three variance component parameters,  
211 we calculated PVE by self or neighbor effects as  $\text{PVE}_{\text{self}} = \sigma_1^2/(\sigma_1^2 + \sigma_2^2 + \sigma_e^2)$  or  $\text{PVE}_{\text{nei}} =$   
212  $\sigma_2^2/(\sigma_1^2 + \sigma_2^2 + \sigma_e^2)$ . Additionally, the heritability was designated as  $h^2 = \sigma_1^2/(\sigma_1^2 + \sigma_e^2)$  when  
213  $\sigma_2^2$  was set at 0.

214 Using the linear mixed model eq. 3, our previous simulations revealed that the effective  
215 spatial scale of neighbor effects could be determined by increasing the patterns of  $\text{PVE}_{\text{nei}}$   
216 from  $s = 0$  to a large  $s$  (Sato et al., 2019b). If the effective range was narrow,  $\text{PVE}_{\text{nei}}$   
217 approached to a plateau at a small value of  $s$ . In contrast,  $\text{PVE}_{\text{nei}}$  linearly increased with  $s$   
218 if the effective range was broad. To generalize these results for a continuous two-dimensional  
219 space, here we introduced  $\Delta\text{PVE}$  metric as differences in PVE from  $s$  to  $s + 1$  such that  
220  $\Delta\text{PVE} = \text{PVE}_{\text{nei},s+1} - \text{PVE}_{\text{nei},s}$ . Using such differential metrics, we quantified how  $\text{PVE}_{\text{nei}}$   
221 approached to a plateau across  $s$  as follows:

- 222 1. Categorize spatial scales as  $s \in S$  based on the percentiles for pairwise Euclidean  
223 distance between individuals.
- 224 2. Calculate  $PVE_{nei}$  from  $s = 1$  to the maximum elements of  $S$ .
- 225 3. Calculate  $\Delta PVE_{nei}$  and determine  $s = \arg \max \Delta PVE_{nei}$

226 The proposed algorithm using a differential PVE was called " $\Delta PVE$  method" hereafter.

### 227 **2.1.5 An R package, "rNeighborQTL"**

228 In addition, the neighbor QTL method was built into an R package, "rNeighborQTL".  
229 The rNeighborQTL took as input objects from the R/qtl package (Broman et al., 2003),  
230 allowing us to save phenotypes and genotypes as common "cross" objects. Because of the  
231 stepwise testing, the self QTL effects yielded the same results as standard QTL mapping.  
232 For the  $\Delta PVE$  method, the mixed models eq. 3 were solved using the algorithm of average  
233 information restricted maximum likelihood (AI-REML) (Gilmour et al., 1995) implemented  
234 in the gaston package (Perdry and Dandine-Roulland, 2020). An additional, but necessary,  
235 input file was a spatial map describing the positions of individuals at the x- and y-axes.  
236 The rNeighborQTL package is available via CRAN at <https://cran.r-project.org/package=rNeighborQTL>.  
237 rNeighborQTL.

238 The rNeighborQTL package included several options to analyze a variety of QTL data.  
239 Alternative to linear (mixed) models (eq. 1 and eq. 3), logistic (mixed) models could also be  
240 selected to handle a binary phenotype (Faraway, 2016; Chen et al., 2016). Because the logis-  
241 tic mixed model did not provide  $\hat{\sigma}_e^2$  (Chen et al., 2016; Perdry and Dandine-Roulland, 2020),  
242  $PVE_{nei}$  was substituted by the ratio of phenotypic variation explained (RVE) by neighbor  
243 effects as  $RVE_{nei} = \hat{\sigma}_2^2 / \hat{\sigma}_1^2$ , when a binary trait was subject to the  $\Delta PVE$  method. The neigh-  
244 bor QTL also allowed additional covariates when conducting a genome scan. This option  
245 enabled composite interval mapping (Jansen, 1993), if genetic markers other than a focal

246 locus were considered covariates. When a significant marker was detected by the single-QTL  
247 analysis, it was also possible to test two-way interactions, such as namely epistasis, between  
248 the neighbor QTL effects across a genome. Details are documented in the rNeighborQTL  
249 package.

## 250 2.2 Simulation

251 We performed a benchmark test using simulated data on F2 and backcross lines. With a ran-  
252 dom spatial map generated, we simulated neighbor effects based on "fake.f2" and "fake.bc"  
253 autosome genotypes implemented in the R/qtl package (Broman et al., 2003). The spatial  
254 positions were sampled from a uniform distribution  $\text{Unif}(1, 100)$  across a continuous two-  
255 dimensional space. We estimated  $a_1$  for self-phenotypes of "fake.f2" and "fake.bc" data after  
256 the trait values were scaled to have a mean of zero and variance of 1, and assigned  $\max \hat{a}_1$  to  
257 a randomly selected marker. In contrast to the major-effect marker, small coefficients, i.e.,  
258  $10^{-3} \times \max \hat{a}_1$ , were assigned to the other markers to simulate polygenic effects. Additive  
259 ( $a_2 = \max \hat{a}_1$  and  $d_2 = 0.25 \times \max \hat{a}_1$ ), dominant ( $a_2 = d_2 = \max \hat{a}_1$ ), and overdominant  
260 ( $a_2 = \max \hat{a}_1$  and  $d_2 = 1.25 \times \max \hat{a}_1$ ) scenarios were analyzed for the F2 lines, while only  
261 additive scenario ( $a_2 = \max \hat{a}_1$  and  $d_2 = -\max \hat{a}_1$ ) was applicable for the backcross lines.  
262 Thirty traits were simulated for true effective distances given at ten to fifty percentiles of  
263 pairwise Euclidean distance among individuals. The simulated neighbor effects were added  
264 to the self-phenotypes of "fake.f2" or "fake.bc" dataset, with 75% of phenotypic variation be-  
265 ing attributable to the neighbor effects. Then we applied the  $\Delta\text{PVE}$  method and a genome  
266 scan for the joint traits, and calculated  $\text{LOD}_{\text{nei}}$  at  $s = \arg \max \Delta\text{PVE}_{\text{nei}}$  to evaluate the  
267 power to detect neighbor effects.

## 268 **2.3 Data**

269 To apply the neighbor QTL on real data, we conducted a pilot QTL experiment using the  
270 yellow-striped flea beetle *Phyllotreta striolata* and RILs of *Arabidopsis thaliana* (Fig. S1A).  
271 Adults of flea beetles access host plants by jumping, and leaf holes made by these beetles  
272 are easily countable. These flea beetles are known to prefer glabrous *A. thaliana* to hairy  
273 accessions (Sato et al., 2019a). To observe large phenotypic variation in leaf holes, we selected  
274 RILs derived from hairy and glabrous accessions in this study.

### 275 **2.3.1 Plants and insects**

276 We used 130 accessions, including parental and recombinant inbred lines between Col(*gl1*)  
277 and Kas-1 accession (Wilson et al., 2001). Col(*gl1*) plants produce no trichomes, while Kas  
278 has sparse trichomes on leaves and stems. The RILs are known to vary in the trichome  
279 production, disease resistance (Wilson et al., 2001), and flowering time (Li et al., 2006).  
280 The genotype data were available in Wilson et al. (2001). The set of RILs was obtained  
281 through the Arabidopsis Biological Resource Center (ABRC) (Stock ID, CS84999: <https://abrc.osu.edu/>).  
282

283 Flea beetles were maintained under a long-day condition (16:8 hours light:dark cycles  
284 with a 22 °C constant air temperature) in an environmental chamber (Biotron LH-241PFD-  
285 SP, NK system, Osaka, Japan). To establish the experimental population, we collected ca.  
286 200 adults from *Brassica* cultivars grown in the field within Otsu City, Shiga Prefecture,  
287 Japan (35°01'N 135°51'E) during November 2018 and May 2019. Adults of *P. striolata*  
288 consume shoots and especially prefer to young glabrous leaves, whereas larvae consume  
289 below-ground tissue of *Brassica* plants; therefore, we reared adults and larvae on leaves and  
290 swollen hypocotyls, respectively. Young leaves of Boc choy *Brassica rapa* var. *chinensis*  
291 or Chinese cabbage *B. rapa* var. *pekinensis* were supplied for the adults. The larvae were  
292 allowed to feed on swollen hypocotyls of the radish *Raphanus sativus* var. *longipinnatus* or

293 the turnip *B. rapa* subsp. *rapa* buried in moisten vermiculite. Adult females laid eggs in the  
294 moisten vermiculite, and it took a month (28 to 32 days) for eggs to become adults.

### 295 **2.3.2 Experimental procedure**

296 To investigate neighbor effects in herbivory, we allowed adult beetles to feed on RIL seedlings  
297 grown in a plastic cell tray. Three seeds for each accession were sown on each compartment  
298 of the cell tray ( $13 \times 10$  cells composed of  $20 \times 20$  mm<sup>2</sup> compartment) with the accessions  
299 randomized. The seeds were acclimated under a constant dark condition with 4 °C for  
300 seven days, and then allowed to germinate under a long-day condition (16:8 hours light:dark  
301 cycles with a 20 °C constant air temperature). The seedlings were grown under the long-day  
302 condition for 24 days, with 2000-fold diluted liquid fertilizer (N:P:K = 6:10:5; Hyponex,  
303 Hyponex Japan, Osaka) supplied once. On day 14 after the germination, the seedlings were  
304 thinned out to leave one seedling per compartment. Prior to the feeding experiment, we  
305 recorded the presence or absence of leaf trichomes and the occurrence of bolting by direct  
306 observation and determined the rosette diameter (mm) by analyzing seedling images using  
307 Image J software (Abràmoff et al., 2004). The cell tray was enclosed by a white mesh  
308 cage (length 29.2 cm  $\times$  width 41.0 cm  $\times$  height 27.0 cm: Fig. S1B). Thirty adult beetles  
309 were released into the cage and allowed to feed on plants for 72 hours. We counted leaf  
310 holes as a measure of herbivory for each plant as flea beetles left small holes when they  
311 fed on leaves (Fig. S1C). The final sample size was 126 individuals; out of 130 accessions,  
312 4 accessions (CS84877, CS84873, CS84950, and CS84894) were not germinated, CS84898  
313 lacked genotype data, and CS84958 had two replicates of individuals. The data are included  
314 in the rNeighborQTL package.

### 315 **2.3.3 Data analysis**

316 We used R version 3.6.0 (R Core Team, 2019) for all statistical analyses. A genetic map  
317 for the Col  $\times$  Kas RILs was estimated using the `est.map()` function in the R/qtl package  
318 (Broman et al., 2003). Self-genotype probabilities were calculated using the `calc.genoprob()`  
319 function implemented in the R/qtl package (Broman et al., 2003). The number of leaf  
320 holes was log-transformed and analyzed using linear models. The presence of trichomes and  
321 bolting was analyzed using logistic models. When analyzing the number of leaf holes, we  
322 incorporated the presence or absence of bolting, the rosette diameter, and the edge (or not)  
323 of the cell tray into covariates. The neighbor QTL was performed using the `rNeighborQTL`  
324 package developed above. Examples using the Col  $\times$  Kas dataset are available in the vignette  
325 of `rNeighborQTL` package, where the usage of each function is also documented. A genome-  
326 wide significance level was determined by empirical percentiles of the maximum LOD score  
327 among 999 permuted traits. We considered  $p < 0.1$  and  $p < 0.05$  a suggestive and significant  
328 level, respectively. We also set an arbitrary threshold at LOD score of 1.5 when discussing  
329 the results.

## 330 **3 Results and Discussion**

### 331 **3.1 Simulation using F2 and backcross lines**

332 We simulated neighbor effects based on "fake.f2" and "fake.bc" data implemented in the  
333 R/qtl package (Broman et al., 2003). The maximum additive deviation of self QTL effects,  
334  $\max \hat{a}_1$ , was 0.56 and 0.28 for F2 and backcross lines, respectively. These values were assigned  
335 for neighbor QTL effects to achieve similar a signal strength between self and neighbor  
336 effects, while minor effects were allocated to other loci. Considering the polygenic variation  
337 as random effects, we applied the  $\Delta$ PVE method for simulated traits. The estimated distance

338 given by  $s = \arg \max \Delta PVE$  increased as the true distance increased (Fig. 3), indicating  
339 that the  $\Delta PVE$  method was effective.

340 When the efficient distance of neighbor effects was limited, such short-range neighbor  
341 effects were well detected using  $\Delta PVE$  method and the quadratic approximation (median  
342  $LOD_{nei} > 4$  at the ten percentile of pairwise Euclidean distance: Fig. 3). Although the  
343 power to detect long-range neighbor effects was lowered, LOD score was still larger than the  
344 Bonferroni threshold (median  $LOD_{nei} > 4$ : Fig. 3). These results indicated that short-range  
345 neighbor effects could be detected in any scenario, although it was relatively difficult to  
346 detect long-range effects.

347 For backcross lines, both short- and long-range neighbor effects were well detected (me-  
348 dian  $LOD_{nei} > 4$  for all  $s$ : Fig. 3D). The backcross lines had two genotypes with the additive  
349 deviation alone and were well fitted using linear approximation (Fig. 3D), whereas the ad-  
350 ditive traits for F2 lines were less likely fitted using the quadratic model assuming three  
351 genotypes with the additive and dominance deviation (Fig. 3A). Given the model structure  
352 underlying F2 lines, it is plausible that the quadratic term was unnecessary for the additive  
353 F2 traits, indeed, it decreased the power to detect neighbor effects.

### 354 **3.2 Self QTL effects in Col $\times$ Kas RILs**

355 The observed number of leaf holes ranged from 0 to 38 with a median of 4 (Fig. S1D). The  
356 total variation in the number of leaf holes was explained at 5% by the trichome production;  
357 2% by bolting; 10% by the rosette diameter; and 22% by the edge effects (Analysis-of-  
358 Variance,  $F = 9.1, 3.7, 20.7, \text{ and } 43.4$ ;  $p = 0.003, 0.06, 10^{-4}, \text{ and } 10^{-8}$ , respectively). With  
359 the kinship matrix  $\mathbf{K}_1$  considered a random effect, a linear mixed model estimated the  
360 heritability as 5.6% for the leaf holes, though it was not significant (Likelihood ratio test,  
361  $\chi_1^2 = 1.82, p = 0.18$ ).

362 To scan self QTL effects, we conducted standard QTL mapping of the trichome produc-



363 tion, the number of leaf holes, and bolting (Fig. 4; Table 2). For self QTL effects on the  
364 trichome production, we detected a strong peak near the *GLABRA1* locus ( $>20$   $\text{LOD}_{\text{self}}$   
365 score: Fig. 4B). Considering the rosette diameter and bolting covariates, we observed a  
366 suggestive but the largest self QTL effect on the leaf holes at the *GLABRA1* locus ( $\text{LOD}_{\text{self}}$   
367  $= 1.97$ : Fig. 4C). For the bolting, we observed the largest significant peak on the bottom  
368 of chromosome 1 ( $>4$   $\text{LOD}_{\text{self}}$ ), and the second largest and suggestive peak on the top of  
369 chromosome 4 ( $\text{LOD}_{\text{self}} = 1.92$ : Fig. 4D).

370 Several studies reported the same QTLs or a particular gene function for the self effects  
371 on trichomes, defense, and flowering. Remarkably, *GLABRA1* gene on the chromosome 3 is  
372 known to encode a myb transcription factor regulating leaf trichome developments (Ishida  
373 et al., 2008) and deter feeding by flea beetles (Sato et al., 2019a). The result that *GLABRA1*  
374 possessed self QTL effects on the leaf holes adds a biological value to the insect herbivory  
375 data. Furthermore, two self-bolting QTLs on the chromosome 1 and 4 were located near  
376 flowering time QTLs in Col  $\times$  Kas RILs (Li et al., 2006). Thus, our pilot experiment supports  
377 previous evidence for the loci responsible for plant development and defense.

### 378 **3.3 Neighbor QTL effects in Col $\times$ Kas RILs**

379 To estimate the effective distance of neighbor effects, we applied  $\Delta\text{PVE}$  method with every  
380 ten percentile categories for pairwise Euclidean distance (Fig. 5). For the number of leaf  
381 holes, the  $\Delta\text{PVE}_{\text{nei}}$  was peaked at 7 distance scale from a focal individual (Fig. 5A), covering  
382 almost all the experimental arena from the center plant. At this estimated distance, the  
383 neighbor effects explained 6% of total variation in the leaf holes, with the both self and  
384 neighbor similarity  $\mathbf{K}_1$  and  $\mathbf{K}_2$  considered random effects in linear mixed models. At 7.8  
385 distance scale, the neighbor effects explained 8.7% of total variation in leaf holes at the  
386 maximum, though it was not significant compared to its heritability by self QTL effects  
387 (Likelihood ratio test,  $\chi_1^2 = 1.03$ ,  $p = 0.31$ ). It seemed plausible that the effective distance

388 was relatively large for insect herbivory, because the adult beetles were likely free to move  
389 within the small experimental cage. On the other hand, the  $\Delta PVE$  became the largest at  
390 the nearest scale for the bolting and explained over a half variation compared to the self  
391 QTL effects ( $RVE_{nei} = 0.68$  at  $s = 2.24$ : Fig. 5B), suggesting that the bolting was unlikely  
392 affected by distant neighbors. For the trichome production,  $\Delta PVE$  method revealed that  
393 there were little variation explained by neighbor effects ( $RVE_{nei} \approx 0$  otherwise models failed  
394 to converge).

395 A genome scan for neighbor effects was performed using the estimated spatial distance  
396 (Fig. 5; Table 2). Regarding the neighbor QTL effects on the leaf holes, we observed,  
397 although weak, the largest QTL on the top of chromosome 4 at the *nga8* marker ( $LOD_{nei}$   
398  $= 1.86$ ), which was also the position the second largest self-bolting QTL occurred. This  
399 neighbor QTL had no significant epistasis as shown by  $< 1.1$  LOD score for all the two-way  
400 interactions between the *nga8* and other markers (Fig. S2A). Neither the neighbor QTL nor  
401 *GLABRA1* locus detected above was overlapped with known self-QTLs of powdery mildew  
402 resistance (Wilson et al., 2001), suggesting independence of the herbivory QTLs on the  
403 disease resistance loci. At the nearest scale for bolting, we found a weak neighbor QTL at  
404 the R30025 marker on the chromosome 3 ( $LOD_{nei} = 1.8$ : Fig. 5; Table 2). This QTL did  
405 not have any significant epistasis with the other markers ( $< 1.1$  LOD score: Fig. S2B).

406 Ecological studies have shown that how easy an individual plant is to find, termed plant  
407 apparency, drives neighbor effects through visual crypsis against herbivores (Hambäck et al.,  
408 2000; Castagneyrol et al., 2013; Strauss et al., 2015). In the present study, the neighbor QTL  
409 involved in the leaf holes was located near a self-bolting QTL at the top of chromosome 4,  
410 suggesting the potential importance of plant apparency in neighbor effects in anti-herbivore  
411 defense. In addition, the positive sign of the additive neighbor effects  $a_2$  at that marker  
412 indicated that the number of leaf holes decreased when neighbors had different genotypes  
413 (Table 2). This implies that the mixture of flowering and vegetative plants may acquire

414 population-wide resistance to flea beetles since the effective distance of neighbor effect was  
415 sufficiently large to encompass almost the entire experimental arena. These results led us to  
416 hypothesize that the self QTL underlying plant apparency might facilitate population-wide  
417 anti-herbivore defense, called associational resistance (Hambäck et al., 2000), through its  
418 pleiotropy on neighbor effects.

### 419 **3.4 Further applicability and limitation**

420 Theoretical advantage of the Ising model lies in its inference of spatial arrangements that  
421 optimize total magnetic energy. Once the self and neighbor coefficients are estimated by the  
422 marker-based regression, these two coefficients may infer which genotype distributions can  
423 minimize or maximize the population-sum of trait values (Sato et al., 2019b). In the context  
424 of neighbor QTL, additive effects suggest that positive and negative  $a_2$  favors clustered  
425 or mixed patterns for maximizing the sum of trait values, respectively. However, in cases  
426 where dominance effects and epistasis are involved, how such a complex genetic basis affects  
427 the optimal spatial arrangement remains unexplored. These potential effects of genetic  
428 architecture on a population-level outcome of neighbor effects would be of theoretical as well  
429 as empirical interest for future studies.

430 Superior to the previous neighbor GWAS, the present neighbor QTL has a flexibility  
431 to deal with heterozygosity. However, the use of neighbor QTL is still restricted to auto-  
432 somes because sex-dependent inheritance of neighbor effects remains unknown. Standard  
433 QTL mapping on sex chromosomes is known to require from one to three degree-of-freedom  
434 (Broman et al., 2006), and thus its extension to neighbor effects may be more complex than  
435 the self QTL effects. In addition, the neighbor QTL approximated the maximum likelihood  
436 method by a quadratic regression, in which phenotype variance was assumed to be equal  
437 among the nine combinations among three QTL genotypes. Our simulation revealed that  
438 the quadratic approximation could handle the overdominance, but became inferior to linear

439 approximation if additive effects alone governed a trait. We should thus be aware of statisti-  
440 cal models behind the neighbor QTL. Practically, both the intercross and the inbred models  
441 might be utilized if a sample population is partially inbred.

### 442 **3.5 Conclusion**

443 The present neighbor QTL, together with the previous neighbor GWAS (Sato et al., 2019b),  
444 provides a sort of novel tools to incorporate neighbor effects into quantitative genetics. These  
445 methods may provide insights into genetic architecture underlying neighbor effects as exem-  
446 plified by the pilot study of insect herbivory on *A. thaliana*. Once the neighbor GWAS  
447 screens candidate accessions, their crossed progeny can be inspected by the neighbor QTL.  
448 The line of R packages, "rNeighborQTL" and "rNeighborGWAS", would help investigate  
449 neighbor effects using a complementary set of GWAS and QTL data.

### 450 **Acknowledgements**

451 The authors are grateful to E. Yamamoto for helpful comments on the draft; to Dynacom  
452 Co., Ltd. for technical assistance on the R package development; and to L. G. Kawaguchi for  
453 collecting insect materials from the field. This study was supported by Japan Science and  
454 Technology Agency (JST) PRESTO (Grant number, JPMJPR17Q4) and Japan Society for  
455 the Promotion of Science (20K15880) to Y.S., and JST CREST (JPMJCR15O2) to A.J.N.  
456 No conflicts of interests concern this study.

## 457 4 Tables

Table 1: QTL effects expected by genotypic identity between the individuals  $i$  and  $j$  with AA, AB, or BB genotypes. The additive and dominance deviation is represented by  $a$  and  $d$ , respectively. The left table shows a case in which a share of same QTL genotypes exerts positive effects on a trait  $y_i$ , whereas the right table shows a case in which a share of same genotypes exerts negative effects on  $y_i$

| $g_i/g_j$ | AA     | AB    | BB     |
|-----------|--------|-------|--------|
| AA        | $a^2$  | $ad$  | $-a^2$ |
| AB        | $ad$   | $d^2$ | $-ad$  |
| BB        | $-a^2$ | $-ad$ | $a^2$  |

| $g_i/g_j$ | AA     | AB    | BB     |
|-----------|--------|-------|--------|
| AA        | $-a^2$ | $-ad$ | $a^2$  |
| AB        | $-ad$  | $d^2$ | $ad$   |
| BB        | $a^2$  | $ad$  | $-a^2$ |

Table 2: Estimated QTL effects in Col  $\times$  Kas RILs of *Arabidopsis thaliana*. Markers with any  $>1.5$  LOD scores (highlighted by bold letters) are shown. Additive effects  $2a_1$  indicate the effect size when Kas alleles are replaced by two Col alleles, while  $2a_2^2$  indicates the effect size of identical homozygotes over different ones. The sign of  $2a_2^2$  determines the direction of neighbor genotypic identity (Table 1). The  $\text{LOD}_{\text{nei}}$  score is shown on the spatial distance at which  $\Delta\text{PVE}$  peaks.

| Trait    | Marker | Chr | Position (cM) | $2a_1$       | $\text{LOD}_{\text{self}}$ | $\pm 2a_2^2$ | $\text{LOD}_{\text{nei}}$ | Distance |
|----------|--------|-----|---------------|--------------|----------------------------|--------------|---------------------------|----------|
| Trichome | GL1    | 3   | 65.24         | <b>-2.83</b> | <b>22.8</b>                | 3.28         | 0.13                      | 7.82     |
| Holes    | GL1    | 3   | 65.24         | <b>0.21</b>  | <b>1.97</b>                | -0.25        | 0.05                      | 7        |
|          | nga8   | 4   | 0             | -0.07        | 0.13                       | <b>2.67</b>  | <b>1.86</b>               | 7        |
| Bolting  | nga692 | 1   | 102.0         | <b>-1.04</b> | <b>4.15</b>                | -0.72        | 0.13                      | 2.24     |
|          | R30025 | 3   | 126.1         | 0.06         | 0.01                       | <b>2.82</b>  | <b>1.80</b>               | 2.24     |
|          | nga8   | 4   | 0             | <b>1.05</b>  | <b>1.92</b>                | 0.41         | 0.02                      | 2.24     |

458 5 Figures

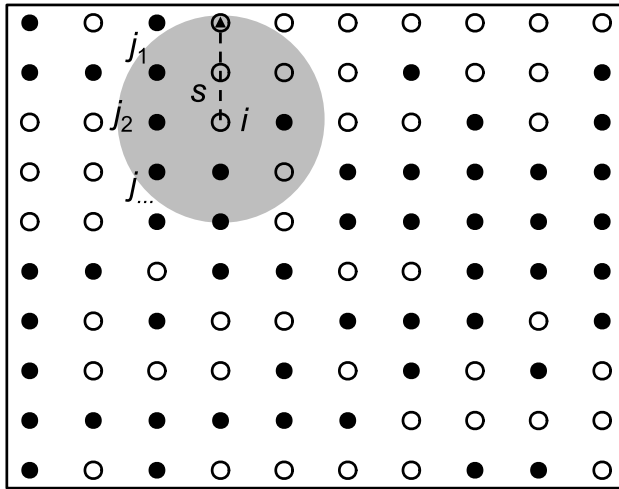

Figure 1: Assumption of neighbor effects in a two-dimensional space. A white or black point indicates an individual having AA or BB genotype, respectively. A grey circle shows an effective area of neighbor effects at the spatial distance  $s$  from the focal individual  $i$ . Neighbor effects then occur depending on genotype similarity between the focal individual  $i$  and all the  $j$ -th neighbors within the spatial distance  $s$ .

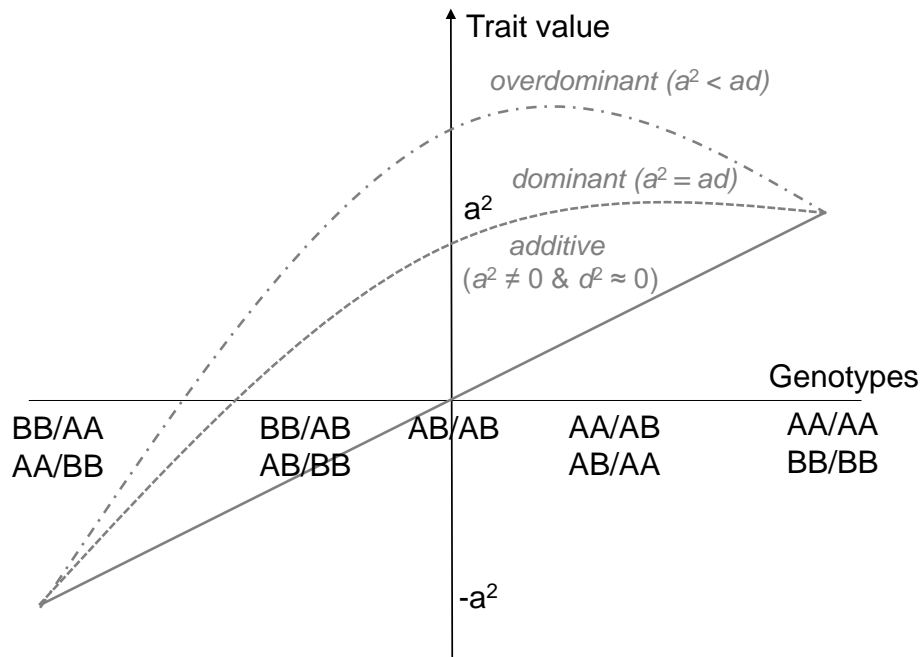

Figure 2: A scheme explaining approximation of neighbor QTL effects by quadratic regression. Trait values  $y_i$  are regressed on nine possible combinations of genotype identity between a focal individual  $i$  and its neighbor  $j$  (Table 1). The additive or dominance deviation  $a$  or  $d$  is represented by the linear or quadratic term, respectively. If the linear coefficient is negative, it indicates the case in which AA/AA and BB/BB combinations had negative QTL effects on traits (Right of Table 1).



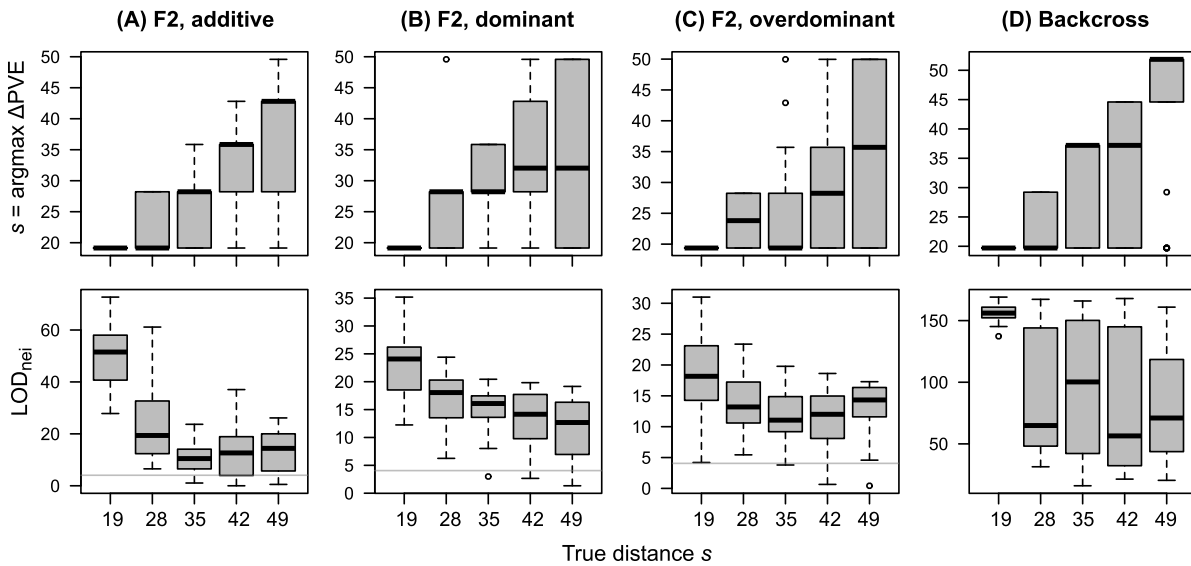

Figure 3: Benchmark test using simulated F2 and backcross datasets. Upper panels show the distance estimated by  $\Delta PVE$  method, while lower panels show  $LOD_{nei}$  of a major-effect marker at the estimated distance. The x-axis corresponds to ten to fifty percentiles of pairwise Euclidean distance. Thirty traits were simulated for each distance class. Boxplots represent median by a center line; upper and lower quartiles by box limits;  $1.5 \times$  interquartile range by whiskers; and outliers by points. Horizontal lines indicate a LOD threshold at  $p = 0.05$  after Bonferroni correction.

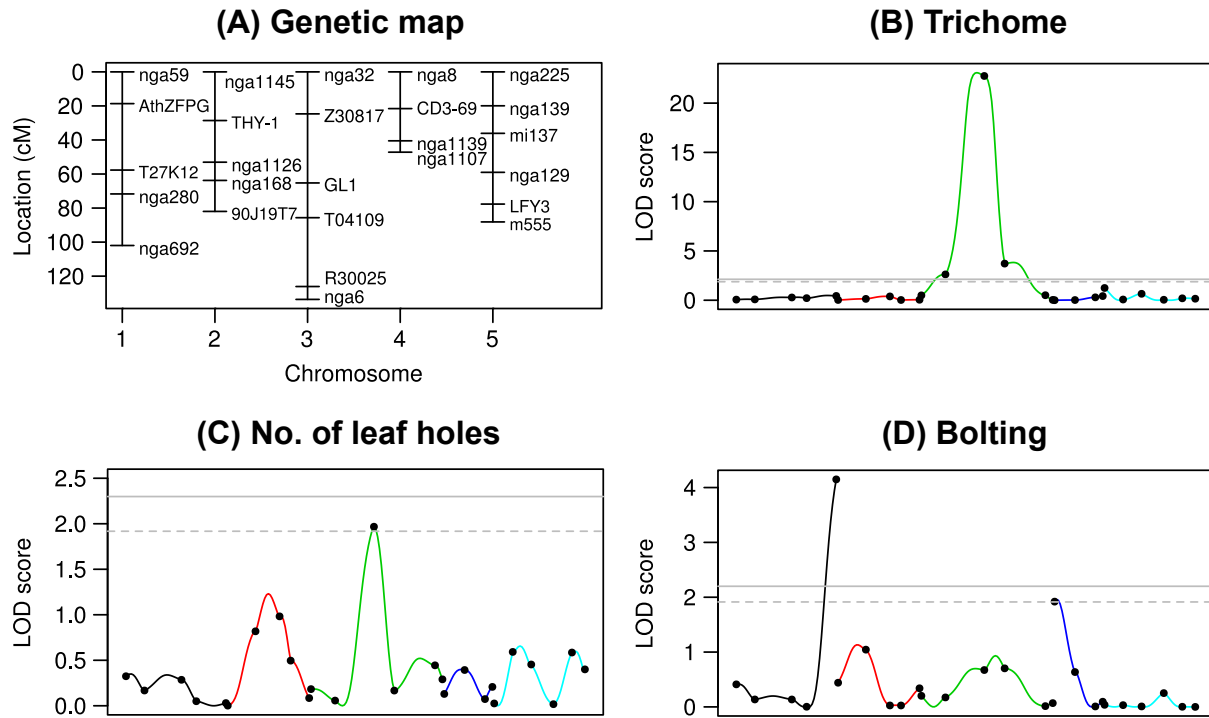

Figure 4: Genetic map and LOD scores for self QTL effects in *Col* × *Kas* RILs. (A) Genetic map showing the locations of 26 markers among the five chromosomes of *Arabidopsis thaliana*.  $\text{LOD}_{\text{self}}$  score for the trichome production (B), the number of leaf holes (C), bolting (D). Colors correspond to chromosome numbers, and dots indicate observed markers. A solid and dashed horizontal line indicates a significant ( $p < 0.05$ ) and suggestive ( $p < 0.1$ ) LOD threshold with 999 permutations, respectively.

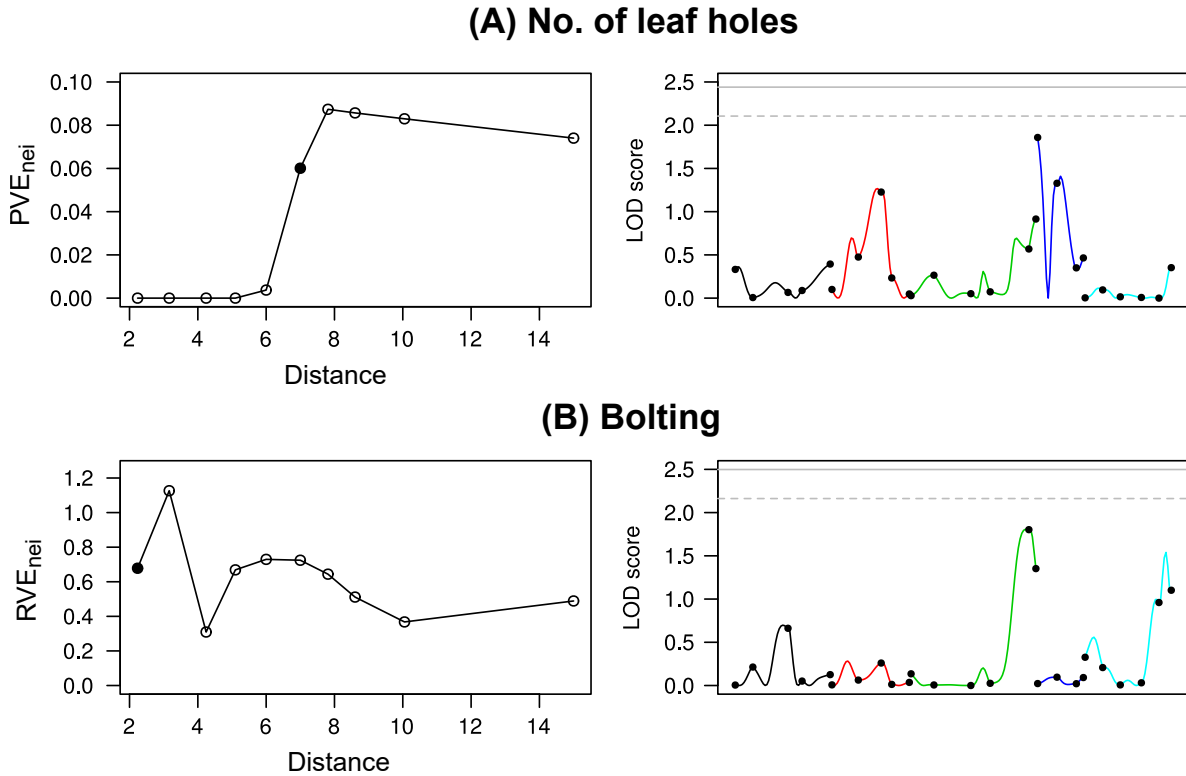

Figure 5: Phenotypic variation explained and LOD score attributed to neighbor effects on the number of leaf holes (A) or the presence of bolting (B) in Col  $\times$  Kas RILs. Left: Proportion or ratio of phenotypic variation explained by neighbor effects (PVE<sub>nei</sub> or RVE<sub>nei</sub>) plotted against the pairwise distance among individuals. A closed point indicates the distance at which  $\Delta$ PVE peaked. Right: LOD<sub>nei</sub> score for neighbor QTL effects at the distance at which  $\Delta$ PVE peaked. Colors correspond to chromosome numbers, and dots indicate observed markers. A solid and dashed horizontal line indicates a significant ( $p < 0.05$ ) and suggestive ( $p < 0.1$ ) LOD threshold with 999 permutations, respectively.

## 459 References

- 460 Abràmoff, M. D., P. J. Magalhães, and S. J. Ram, 2004: Image processing with imagej.  
461 *Biophotonics International*, **11** (7), 36–42.
- 462 Barbosa, P., J. Hines, I. Kaplan, H. Martinson, A. Szczepaniec, and Z. Szendrei, 2009:  
463 Associational resistance and associational susceptibility: Having right or wrong neighbors.  
464 *Annual Review of Ecology, Evolution, and Systematics*, **40** (1), 1–20, doi:10.1146/annurev.  
465 ecolsys.110308.120242.
- 466 Broman, K. W., D. M. Gatti, P. Simecek, N. A. Furlotte, P. Prins, Ś. Sen, B. S. Yandell,  
467 and G. A. Churchill, 2019: R/qtl2: Software for mapping quantitative trait loci with  
468 high-dimensional data and multiparent populations. *Genetics*, **211** (2), 495–502, doi:  
469 10.1534/genetics.118.301595.
- 470 Broman, K. W., and Ś. Sen, 2009: Single-QTL analysis. *A Guide to QTL Mapping with*  
471 *R/qtl*, K. W. Broman, and Ś. Sen, Eds., Springer, 75–133.
- 472 Broman, K. W., Ś. Sen, S. E. Owens, A. Manichaikul, E. M. Southard-Smith, and G. A.  
473 Churchill, 2006: The x chromosome in quantitative trait locus mapping. *Genetics*, **174** (4),  
474 2151–2158, doi:10.1534/genetics.106.061176.
- 475 Broman, K. W., H. Wu, Ś. Sen, and G. A. Churchill, 2003: R/qtl: QTL mapping in experi-  
476 mental crosses. *Bioinformatics*, **19** (7), 889–890, doi:10.1093/bioinformatics/btg112.
- 477 Castagneyrol, B., B. Giffard, C. Péré, and H. Jactel, 2013: Plant apparency, an overlooked  
478 driver of associational resistance to insect herbivory. *Journal of Ecology*, **101** (2), 418–429.
- 479 Chen, H., and Coauthors, 2016: Control for population structure and relatedness for binary  
480 traits in genetic association studies via logistic mixed models. *The American Journal of*  
481 *Human Genetics*, **98** (4), 653–666, doi:10.1016/j.ajhg.2016.02.012.

- 482 Faraway, J. J., 2016: *Extending the linear model with R: generalized linear, mixed effects and*  
483 *nonparametric regression models*. CRC press.
- 484 Gilmour, A. R., R. Thompson, and B. R. Cullis, 1995: Average information reml: an efficient  
485 algorithm for variance parameter estimation in linear mixed models. *Biometrics*, 1440–  
486 1450.
- 487 Haley, C. S., and S. A. Knott, 1992: A simple regression method for mapping quantitative  
488 trait loci in line crosses using flanking markers. *Heredity*, **69** (4), 315–324, doi:10.1038/  
489 hdy.1992.131.
- 490 Hambäck, P. A., J. Ågren, and L. Ericson, 2000: Associational resistance: insect damage to  
491 purple loosestrife reduced in thickets of sweet gale. *Ecology*, **81** (7), 1784–1794.
- 492 Han, K., H. Y. Lee, N. Y. Ro, O. S. Hur, J. H. Lee, J. K. Kwon, and B. C. Kang, 2018: QTL  
493 mapping and GWAS reveal candidate genes controlling capsaicinoid content in *Capsicum*.  
494 *Plant Biotechnology Journal*, **16** (9), 1546–1558, doi:10.1111/pbi.12894.
- 495 Hayes, B., 2013: Overview of statistical methods for genome-wide association studies  
496 (GWAS). *Genome-wide association studies and genomic prediction*, C. Gondro, J. Werf,  
497 and B. Hayes, Eds., Springer, 149–169.
- 498 Henderson, C. R., O. Kempthorne, S. R. Searle, and C. Von Krosigk, 1959: The estimation  
499 of environmental and genetic trends from records subject to culling. *Biometrics*, **15** (2),  
500 192–218.
- 501 Ishida, T., T. Kurata, K. Okada, and T. Wada, 2008: A genetic regulatory network in the  
502 development of trichomes and root hairs. *Annual Review of Plant Biology*, **59**, 365–386.
- 503 Jansen, R. C., 1993: Interval mapping of multiple quantitative trait loci. *Genetics*, **135** (1),  
504 205–211.

- 505 Kang, H. M., N. A. Zaitlen, C. M. Wade, A. Kirby, D. Heckerman, M. J. Daly, and E. Eskin,  
506 2008: Efficient control of population structure in model organism association mapping.  
507 *Genetics*, **178** (3), 1709–1723, doi:10.1534/genetics.107.080101.
- 508 Korte, A., and A. Farlow, 2013: The advantages and limitations of trait analysis with GWAS:  
509 a review. *Plant Methods*, **9** (1), 29, doi:10.1186/1746-4811-9-29.
- 510 Lander, E. S., and P. Green, 1987: Construction of multilocus genetic linkage maps in  
511 humans. *Proceedings of the National Academy of Sciences*, **84** (8), 2363–2367.
- 512 Li, Y., P. Roycewicz, E. Smith, and J. O. Borevitz, 2006: Genetics of local adaptation  
513 in the laboratory: Flowering time quantitative trait loci under geographic and seasonal  
514 conditions in *Arabidopsis*. *PLoS ONE*, **1** (1), e105, doi:10.1371/journal.pone.0000105.
- 515 Marchadier, E., and Coauthors, 2019: The complex genetic architecture of shoot growth  
516 natural variation in *Arabidopsis thaliana*. *PLoS Genetics*, **15** (4), e1007954, doi:10.1371/  
517 journal.pgen.1007954.
- 518 McCoy, B. M., and J.-M. Maillard, 2012: The importance of the ising model. *Progress of*  
519 *Theoretical Physics*, **127** (5), 791–817, doi:10.1143/PTP.127.791.
- 520 Perdry, H., and C. Dandine-Roulland, 2020: *gaston: Genetic Data Handling (QC, GRM,*  
521 *LD, PCA) & Linear Mixed Models*. URL <https://CRAN.R-project.org/package=gaston>,  
522 r package version 1.5.6.
- 523 R Core Team, 2019: *R: A Language and Environment for Statistical Computing*. Vienna,  
524 Austria, R Foundation for Statistical Computing, URL <https://www.R-project.org/>.
- 525 Rishmawi, L., J. Bühler, J. Benjamin, M. Hülskamp, and M. Koornneef, 2017: Quantitative  
526 trait loci controlling leaf venation in *Arabidopsis*. *Plant, Cell & Environment*, **40** (8),  
527 1429–1441.

- 528 Sato, Y., 2018: Associational effects and the maintenance of polymorphism in plant defense  
529 against herbivores: review and evidence. *Plant Species Biology*, **33** (2), 91–108, doi:10.  
530 1111/1442-1984.12201.
- 531 Sato, Y., R. Shimizu-Inatsugi, M. Yamazaki, K. K. Shimizu, and A. J. Nagano, 2019a:  
532 Plant trichomes and a single gene *GLABRA1* contribute to insect community com-  
533 position on field-grown *Arabidopsis thaliana*. *BMC Plant Biology*, **19** (1), doi:10.1186/  
534 s12870-019-1705-2.
- 535 Sato, Y., E. Yamamoto, K. K. Shimizu, and A. J. Nagano, 2019b: Neighbor GWAS: incorpo-  
536 rating neighbor genotypic identity into genome-wide association studies of field herbivory  
537 on *Arabidopsis thaliana*. *bioRxiv*, 845735, doi:10.1101/845735.
- 538 Schuman, M. C., S. Allmann, and I. T. Baldwin, 2015: Plant defense phenotypes determine  
539 the consequences of volatile emission for individuals and neighbors. *eLife*, **4**, doi:10.7554/  
540 eLife.04490.
- 541 Sonah, H., L. O'Donoghue, E. Cober, I. Rajcan, and F. Belzile, 2015: Identification of loci  
542 governing eight agronomic traits using a GBS-GWAS approach and validation by QTL  
543 mapping in soya bean. *Plant Biotechnology Journal*, **13** (2), 211–221, doi:10.1111/pbi.  
544 12249.
- 545 Strauss, S. Y., N. I. Cacho, M. W. Schwartz, A. C. Schwartz, and K. C. Burns, 2015:  
546 Apparency revisited. *Entomologia Experimentalis et Applicata*, **157** (1), 74–85.
- 547 Subrahmaniam, H. J., C. Libourel, E.-P. Journet, J.-B. Morel, S. Muños, A. Niebel, S. Raf-  
548 faele, and F. Roux, 2018: The genetics underlying natural variation of plant–plant inter-  
549 actions, a beloved but forgotten member of the family of biotic interactions. *The Plant*  
550 *Journal*, **93** (4), 747–770.

- 551 Tamura, M., T. Ohgushi, and T. Y. Ida, 2020: Intraspecific neighbourhood effect:  
552 Population-level consequence of aggregation of highly defended plants. *Functional Ecology*,  
553 **34 (3)**, 597–605.
- 554 Underwood, N., P. A. Hambäck, and B. D. Inouye, 2020: Pollinators, herbivores, and plant  
555 neighborhood effects. *The Quarterly Review of Biology*, **95 (1)**, 37–57.
- 556 Wilson, I. W., C. L. Schiff, D. E. Hughes, and S. C. Somerville, 2001: Quantitative trait  
557 loci analysis of powdery mildew disease resistance in the *Arabidopsis thaliana* accession  
558 kashmir-1. *Genetics*, **158 (3)**, 1301–1309.
- 559 Wuest, S. E., and P. A. Niklaus, 2018: A plant biodiversity effect resolved to a sin-  
560 gle chromosomal region. *Nature Ecology & Evolution*, **2 (12)**, 1933–1939, doi:10.1038/  
561 s41559-018-0708-y.
- 562 Yang, L.-N., and Coauthors, 2019: Enhanced agricultural sustainability through within-  
563 species diversification. *Nature Sustainability*, **2 (1)**, 46–52.
- 564 Zeller, S. L., O. Kalinina, D. F. Flynn, and B. Schmid, 2012: Mixtures of genetically modified  
565 wheat lines outperform monocultures. *Ecological Applications*, **22 (6)**, 1817–1826.



566 Supplementary Materials

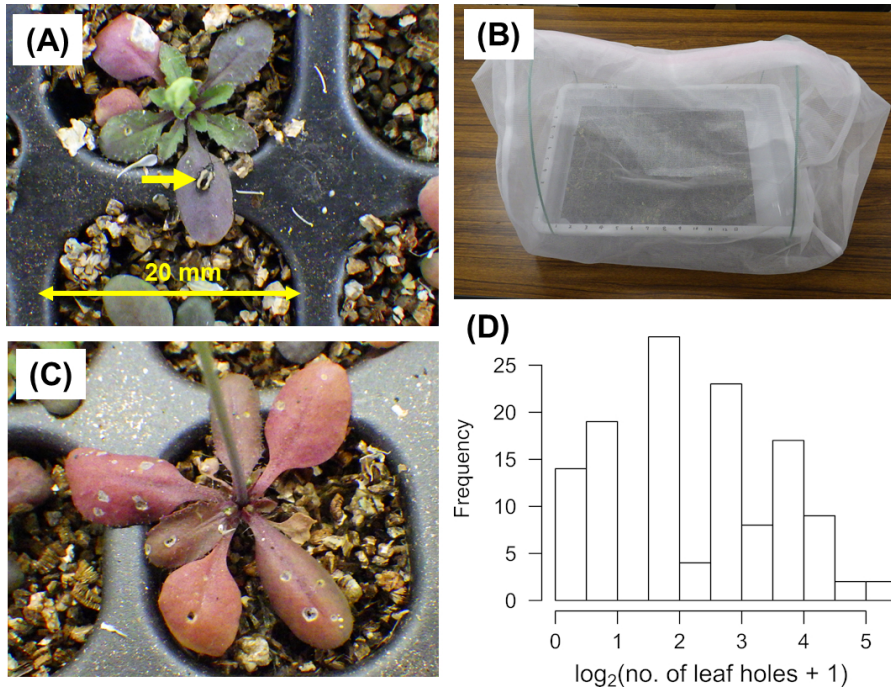

Figure S1: Pilot QTL experiment using *Arabidopsis thaliana* and the yellow-striped flea beetle *Phyllotreta striolata*. (A) An adult beetle on a vegetative plant. (B) An experimental cage including 130 Col  $\times$  Kas RILs. (C) A plant attacked by *P. striolata*. Leaf holes were made by adult beetles. (D) Histogram for the observed number of leaf holes.

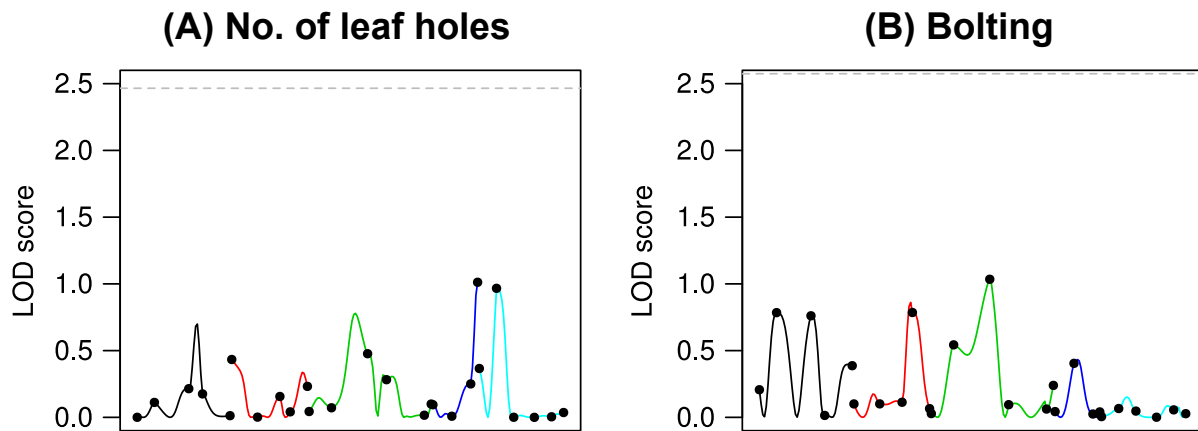

Figure S2: Epistasis in neighbor QTL effects on the number of leaf holes between the *nga8* and other markers (A); or on the presence of bolting between the R30025 and other markers (B). Colors correspond to chromosome numbers, and dots indicate observed markers. A dashed horizontal line indicates a suggestive ( $p < 0.1$ ) LOD threshold with 999 permutations.
